# Supplementary material
Source: PubMed Central journal article supplement (PMC8808327)

**Figure S12. Evolution of CAI values calculated for concatenated SARS-CoV-2 genes over time.**

**A.**  $W$  calculated as the average of  $w_i$  for every highly expressed gene in a specific human tissue ( $W_{avg}$ ).

**B.**  $W$  calculated for concatenated highly expressed genes in a specific human tissue ( $W_{concat}$ ).

### Adrenal Gland

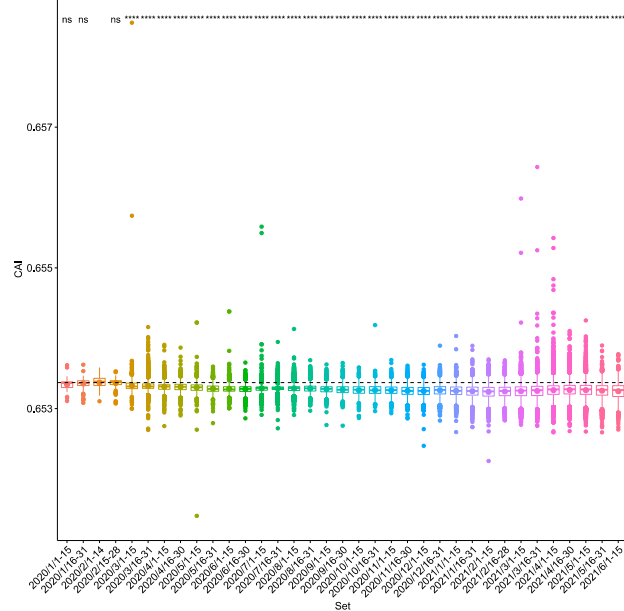

### Adrenal Gland

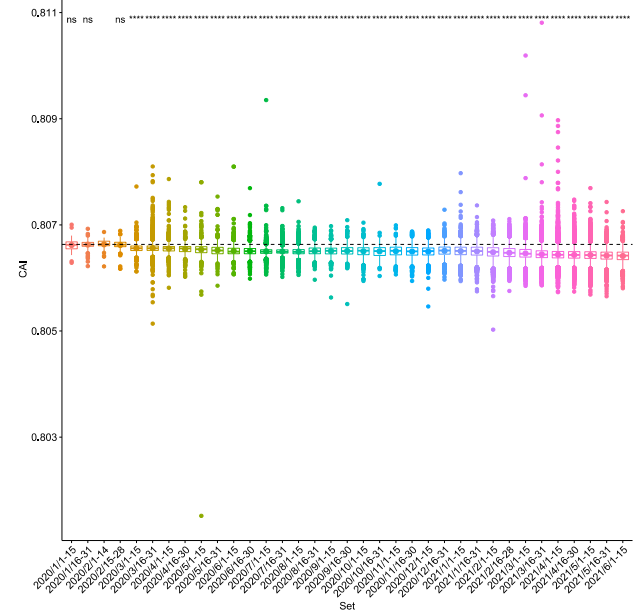

### Thyroid Gland

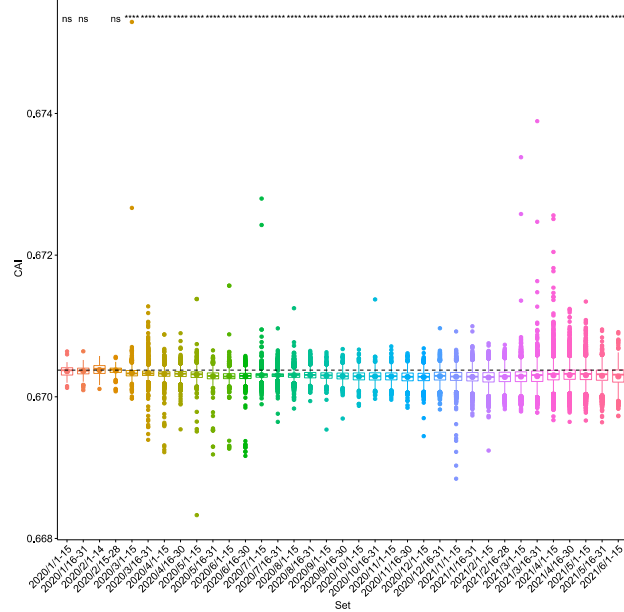

### Thyroid Gland

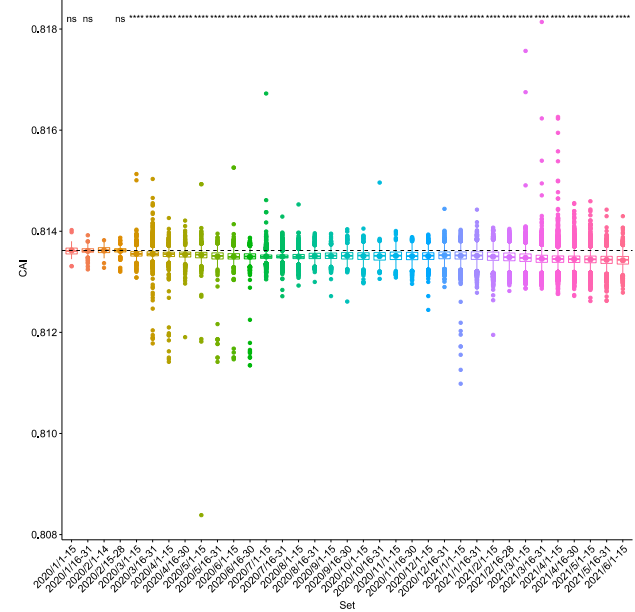

**Figure S12. Evolution of CAI values calculated for concatenated SARS-CoV-2 genes over time.**

**A.**  $W$  calculated as the average of  $w_i$  for every highly expressed gene in a specific human tissue ( $W_{avg}$ ).

**B.**  $W$  calculated for concatenated highly expressed genes in a specific human tissue ( $W_{concat}$ ).

**Pituitary Gland**

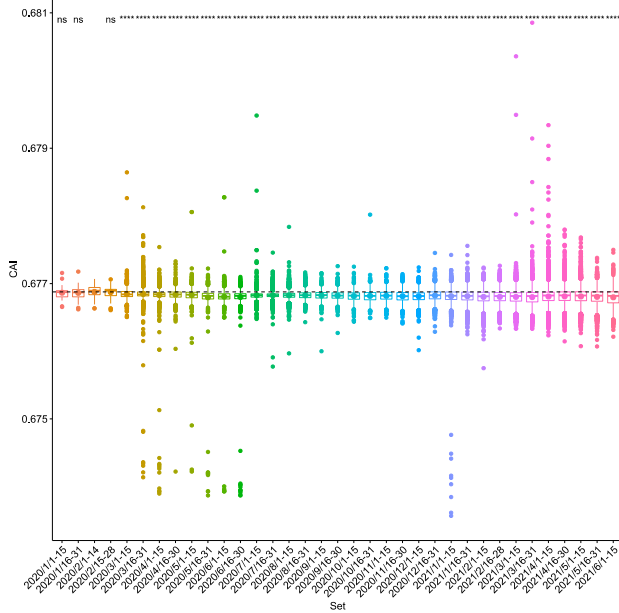

**Pituitary Gland**

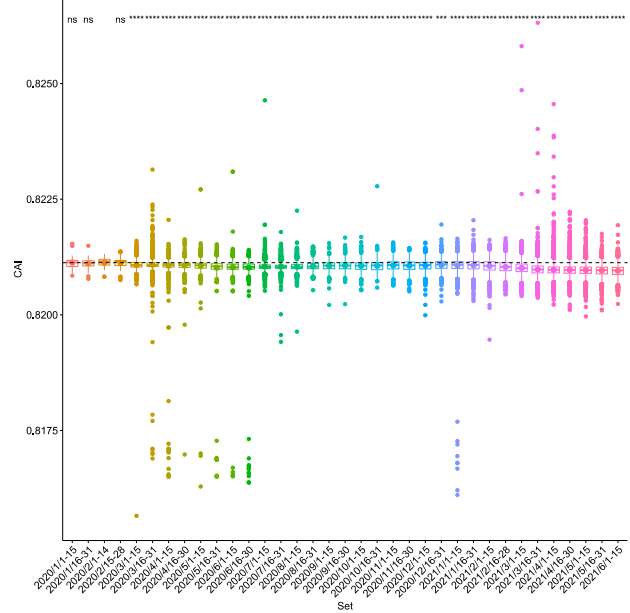

**Kidneys**

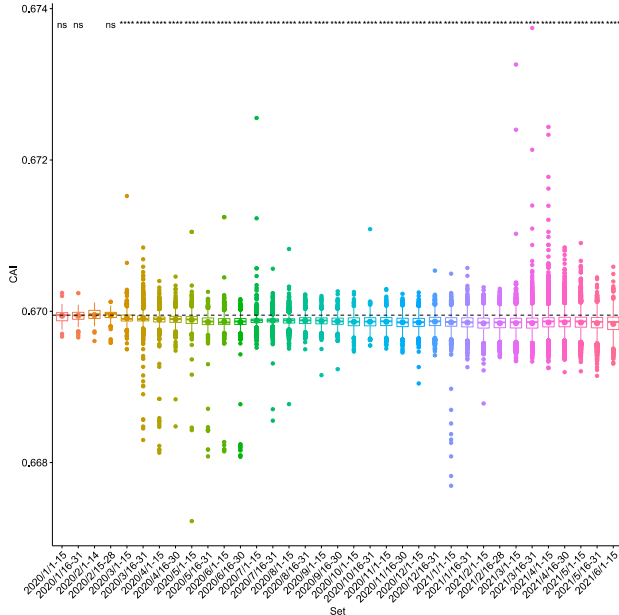

**Kidneys**

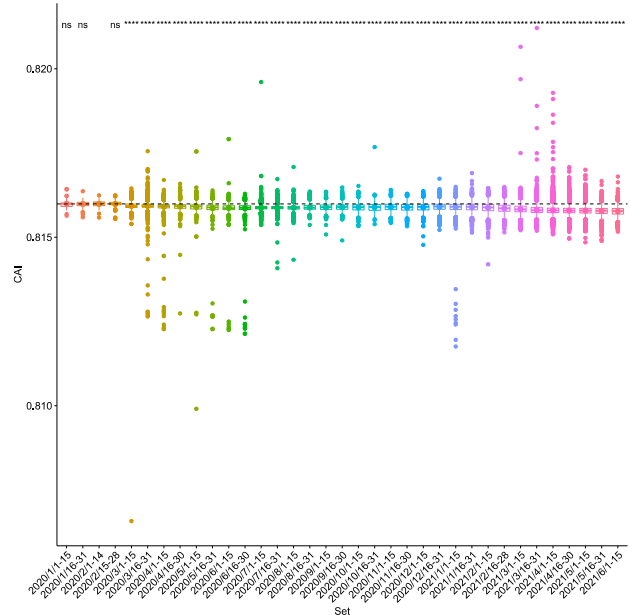

**Figure S12. Evolution of CAI values calculated for concatenated SARS-CoV-2 genes over time.**

**A.**  $W$  calculated as the average of  $w_i$  for every highly expressed gene in a specific human tissue ( $W_{avg}$ ).

**B.**  $W$  calculated for concatenated highly expressed genes in a specific human tissue ( $W_{concat}$ ).

**Intestine**

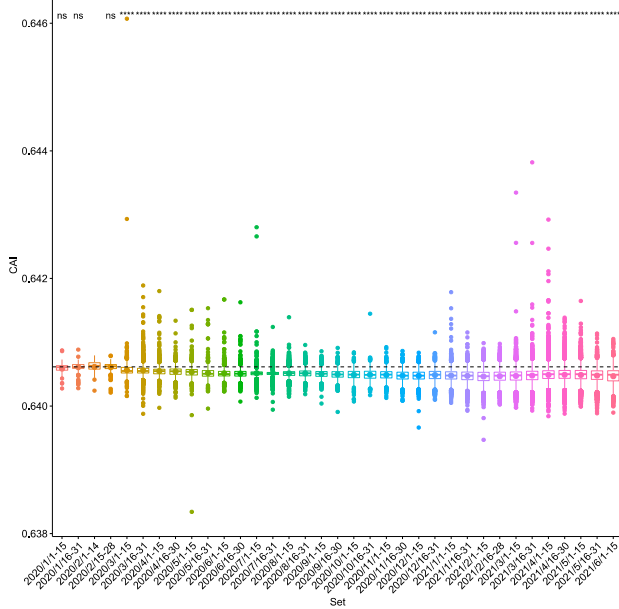

**Intestine**

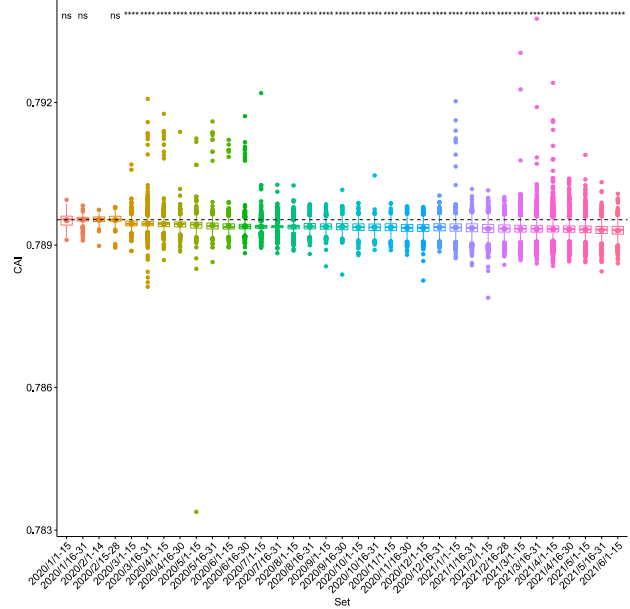

**Heart**

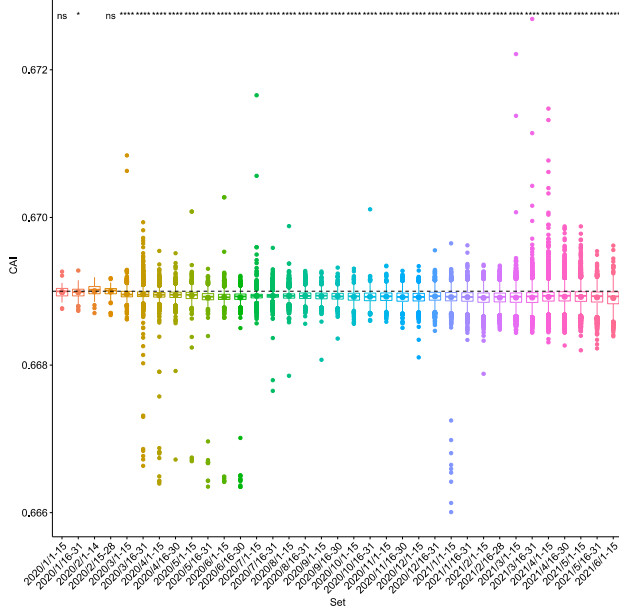

**Heart**

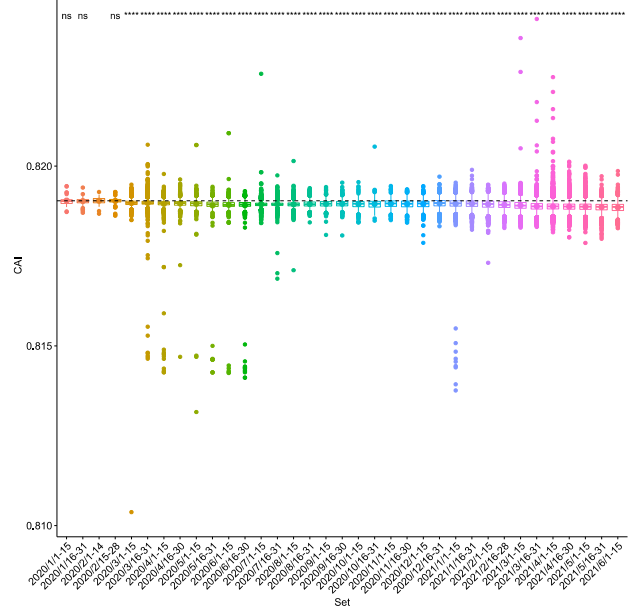

**Figure S12. Evolution of CAI values calculated for concatenated SARS-CoV-2 genes over time.**

**A.**  $W$  calculated as the average of  $w_i$  for every highly expressed gene in a specific human tissue ( $W_{avg}$ ).

**B.**  $W$  calculated for concatenated highly expressed genes in a specific human tissue ( $W_{concat}$ ).

**Lungs**

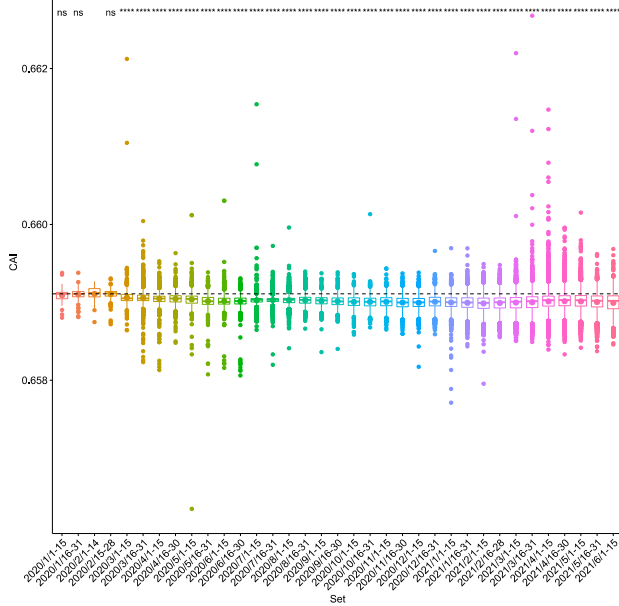

**Lungs**

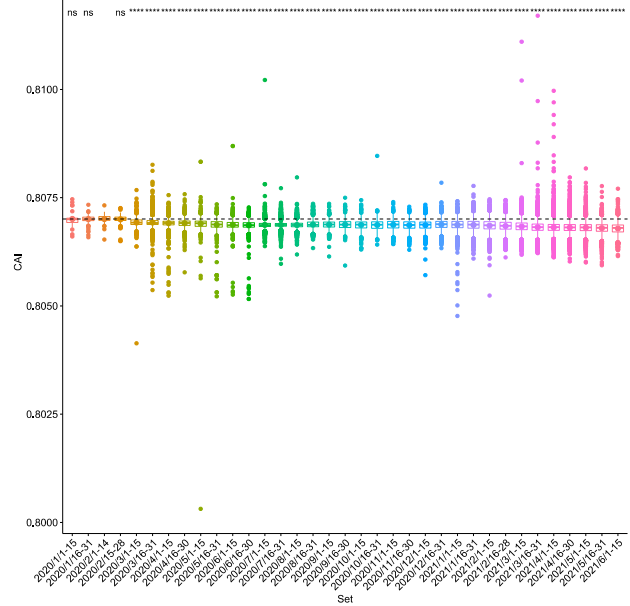

**Brain**

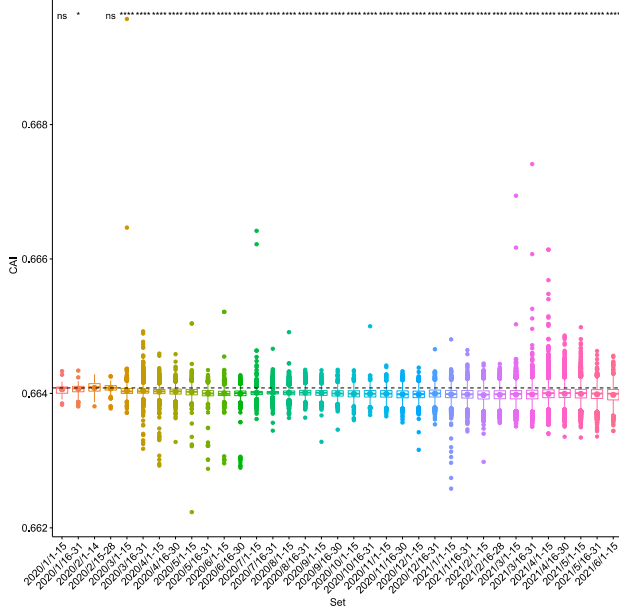

**Brain**

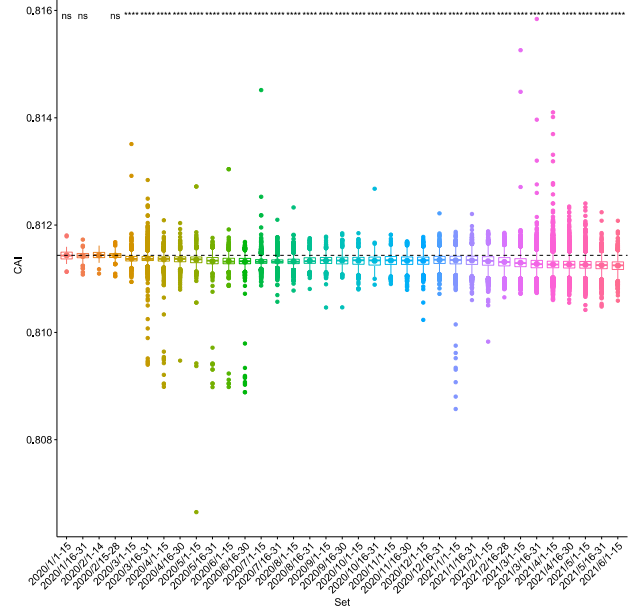

**Figure S12. Evolution of CAI values calculated for concatenated SARS-CoV-2 genes over time.**

**A.**  $W$  calculated as the average of  $w_i$  for every highly expressed gene in a specific human tissue ( $W_{avg}$ ).

**B.**  $W$  calculated for concatenated highly expressed genes in a specific human tissue ( $W_{concat}$ ).

### Stomach

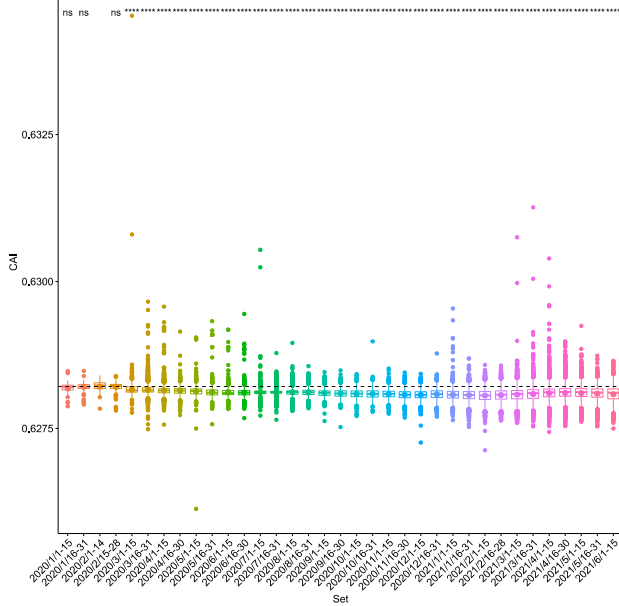

### Stomach

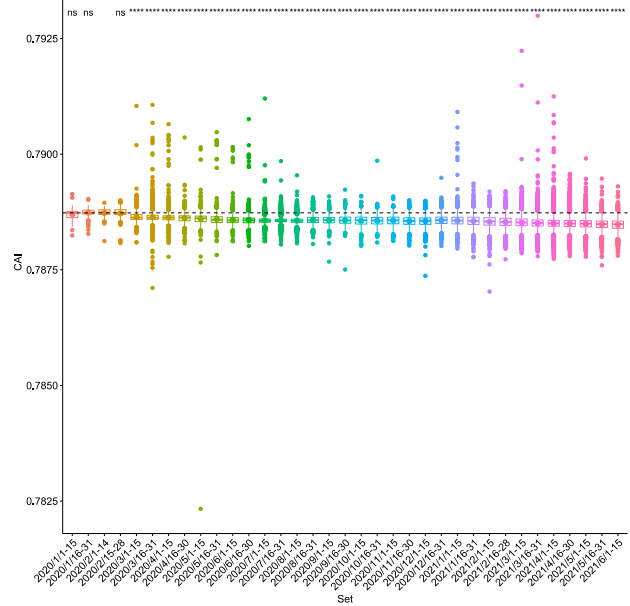

### Spleen

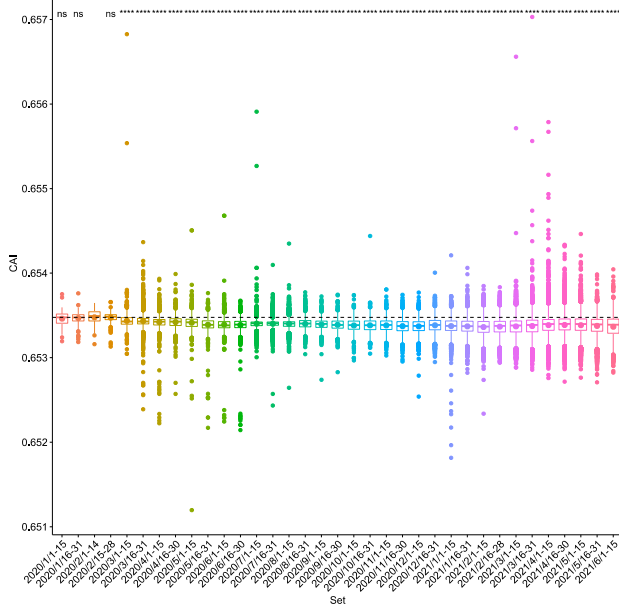

### Spleen

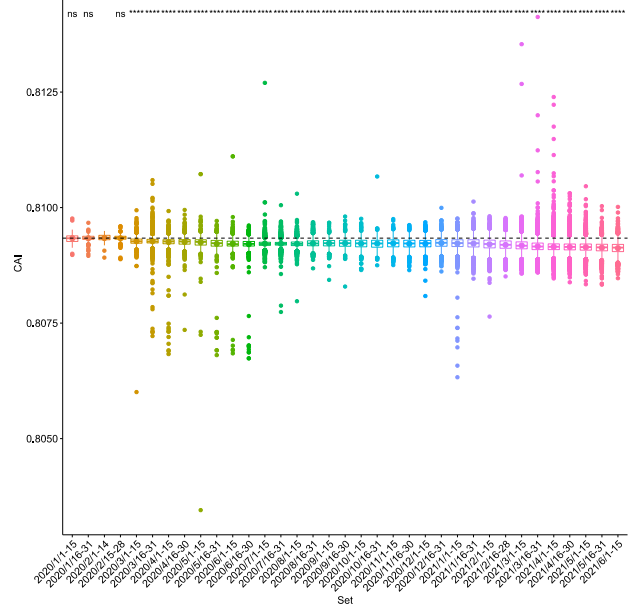

**Figure S12. Evolution of CAI values calculated for concatenated SARS-CoV-2 genes over time.**

**A.**  $W$  calculated as the average of  $w_i$  for every highly expressed gene in a specific human tissue ( $W_{avg}$ ).

**B.**  $W$  calculated for concatenated highly expressed genes in a specific human tissue ( $W_{concat}$ ).

**Skin**

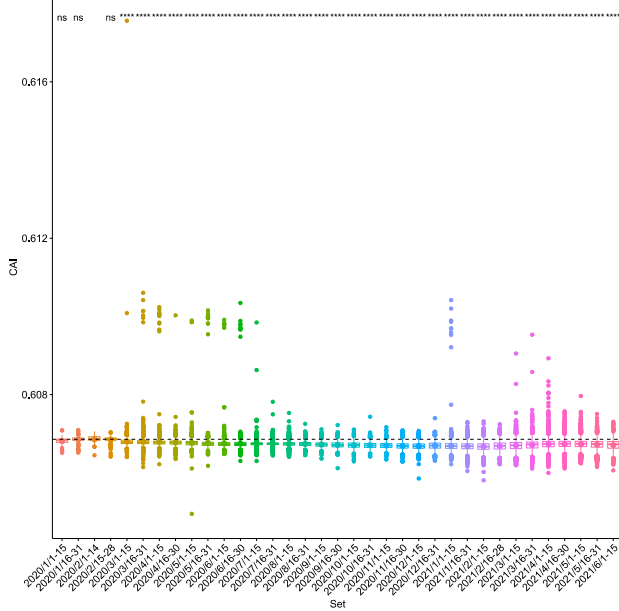

**Skin**

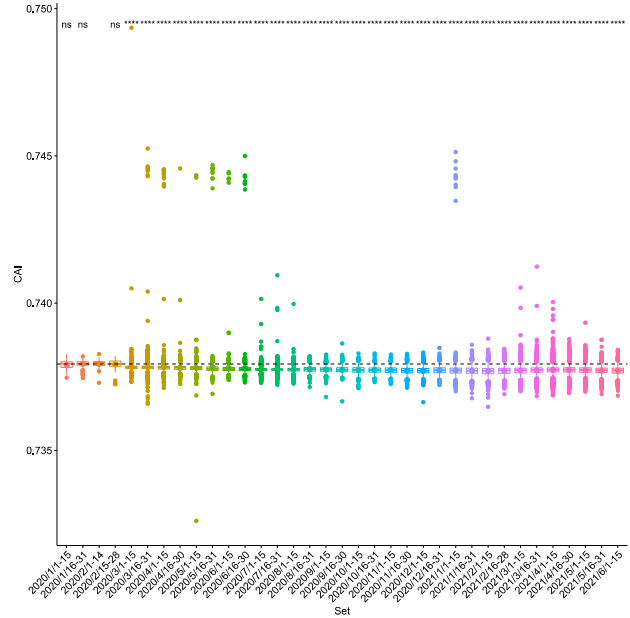

**Eye**

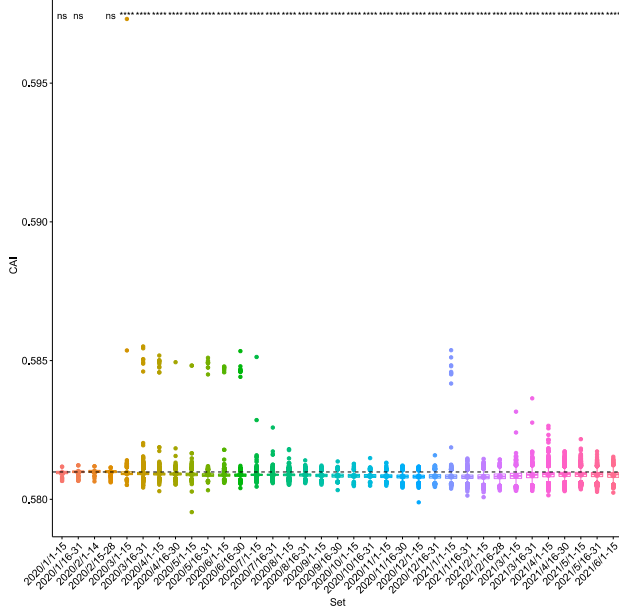

**Eye**

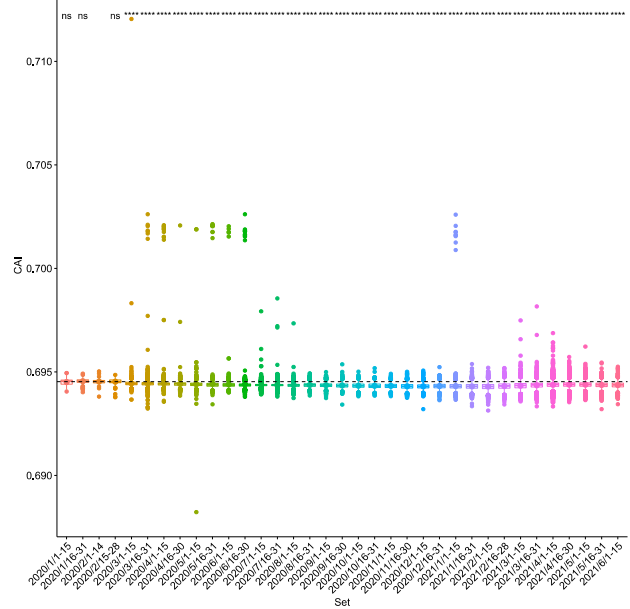

**Figure S12. Evolution of CAI values calculated for concatenated SARS-CoV-2 genes over time.**

**A.**  $W$  calculated as the average of  $w_i$  for every highly expressed gene in a specific human tissue ( $W_{avg}$ ).

**B.**  $W$  calculated for concatenated highly expressed genes in a specific human tissue ( $W_{concat}$ ).

### Urinary Bladder

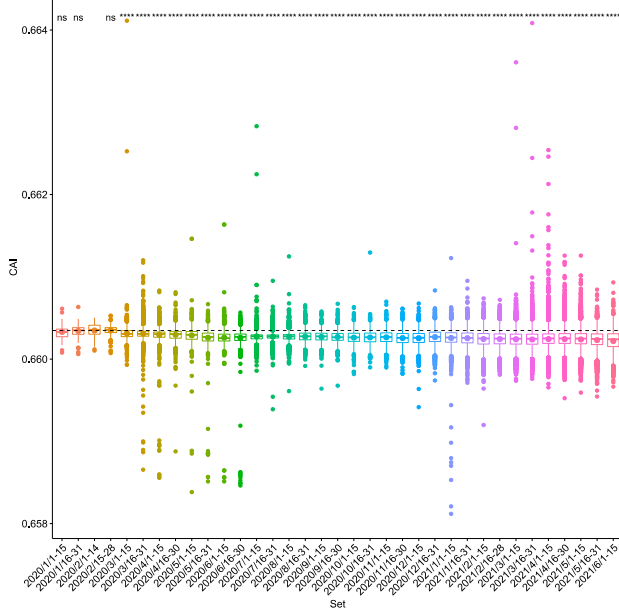

### Urinary Bladder

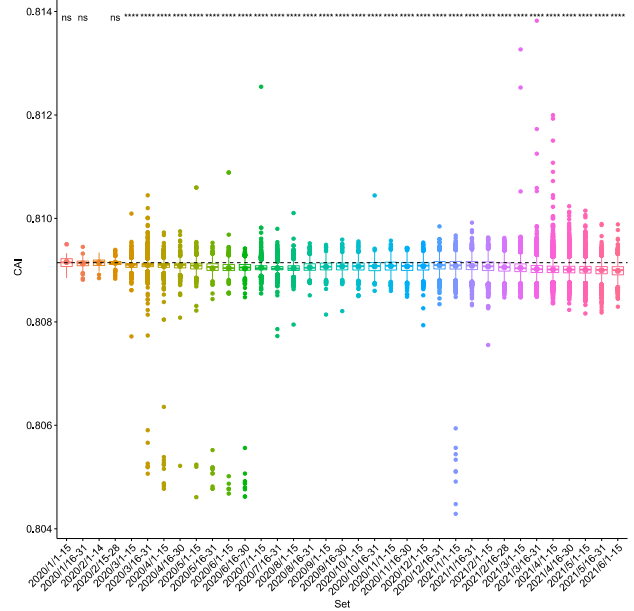

### Granulocytes

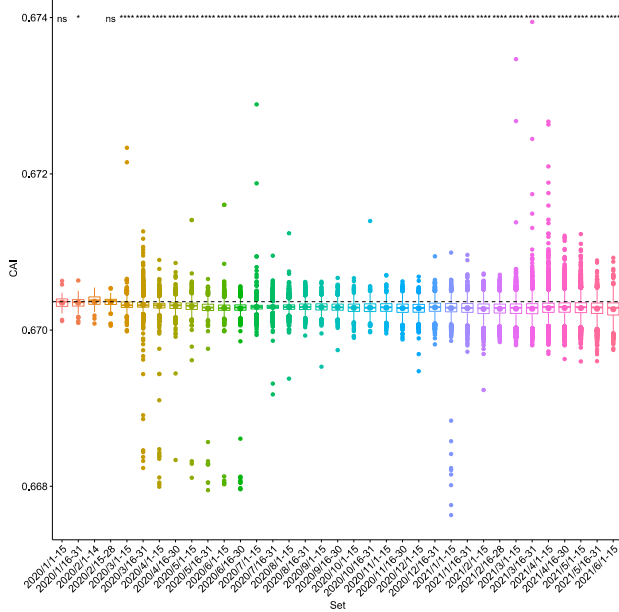

### Granulocytes

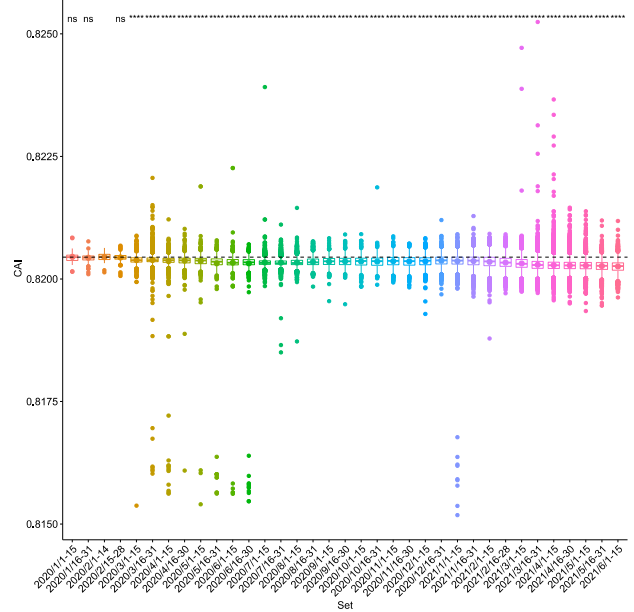

**Figure S12. Evolution of CAI values calculated for concatenated SARS-CoV-2 genes over time.**

**A.**  $W$  calculated as the average of  $w_i$  for every highly expressed gene in a specific human tissue ( $W_{avg}$ ).

**B.**  $W$  calculated for concatenated highly expressed genes in a specific human tissue ( $W_{concat}$ ).

### Monocytes

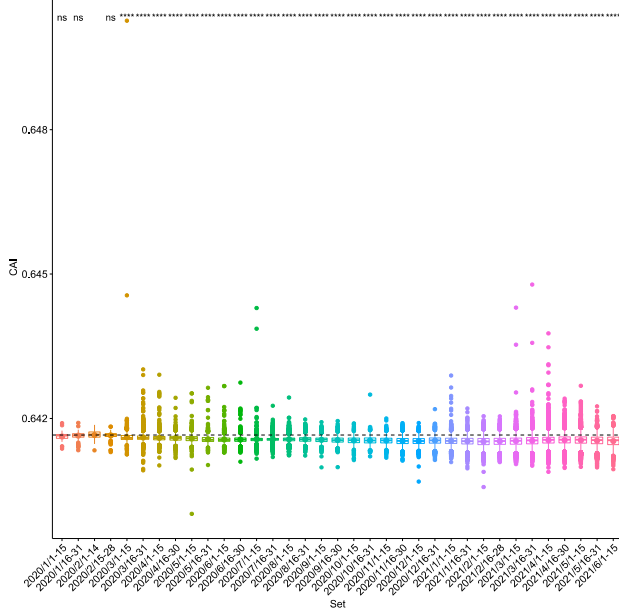

### Monocytes

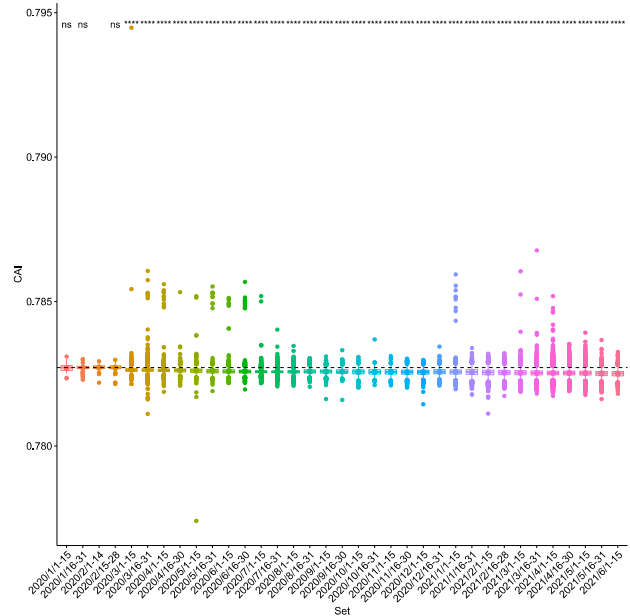

### NK-Cells

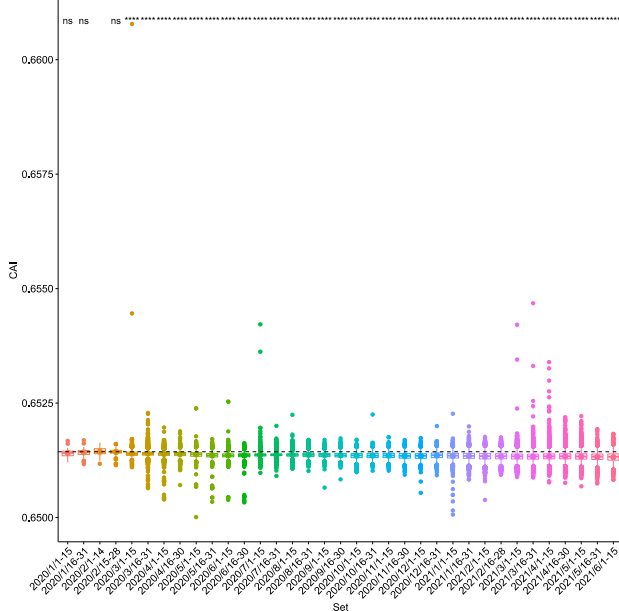

### NK-Cells

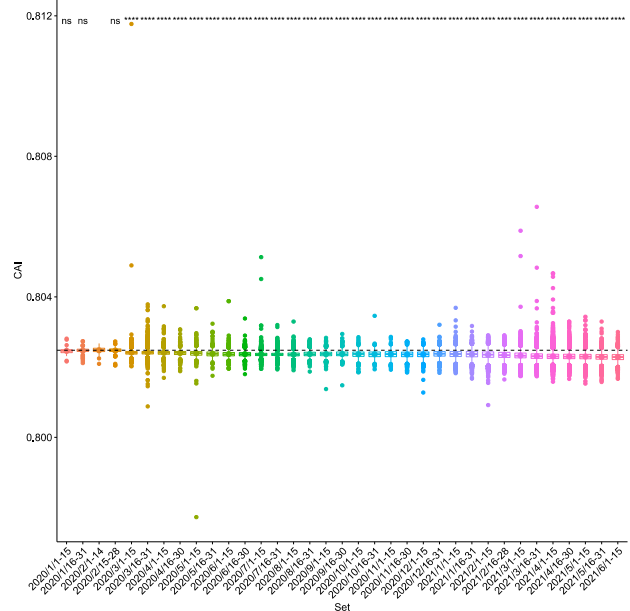



**Figure S12. Evolution of CAI values calculated for concatenated SARS-CoV-2 genes over time.**

**A.**  $W$  calculated as the average of  $w_i$  for every highly expressed gene in a specific human tissue ( $W_{avg}$ ).

**B.**  $W$  calculated for concatenated highly expressed genes in a specific human tissue ( $W_{concat}$ ).

**B-Cells**

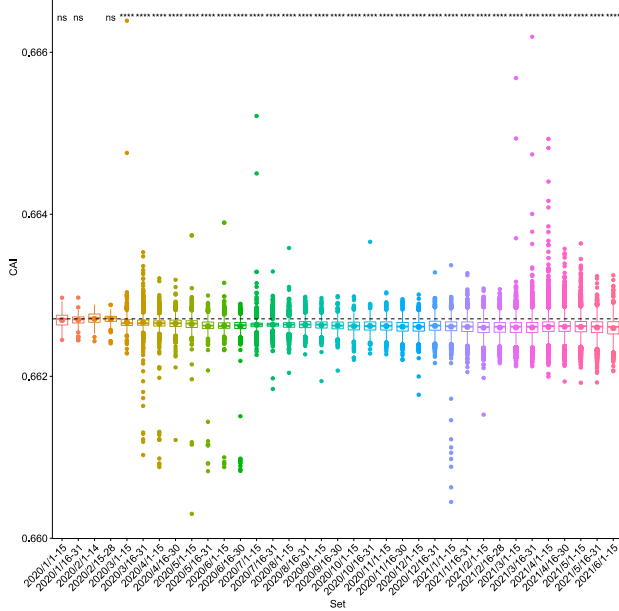

**B-Cells**

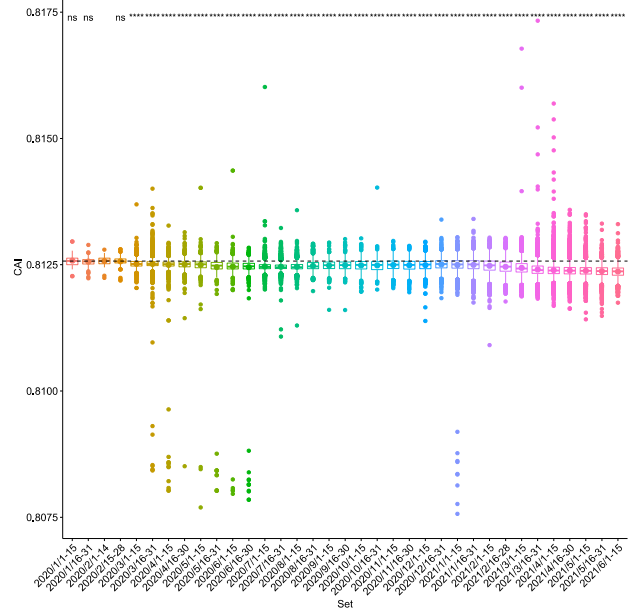

**T-Cells**

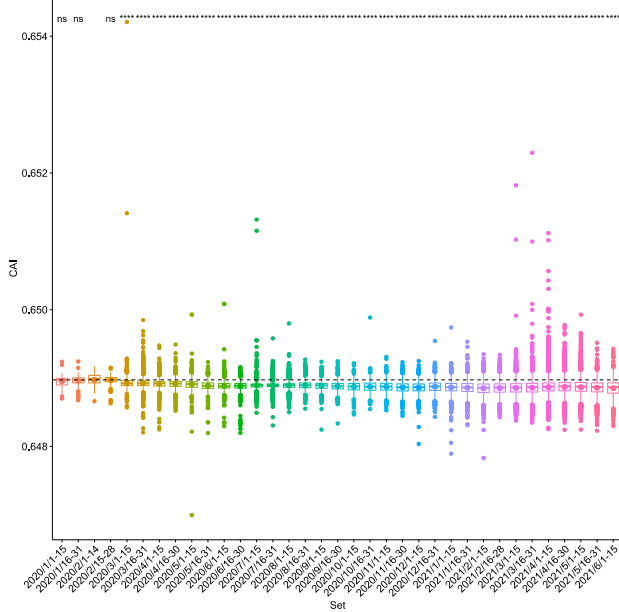

**T-Cells**

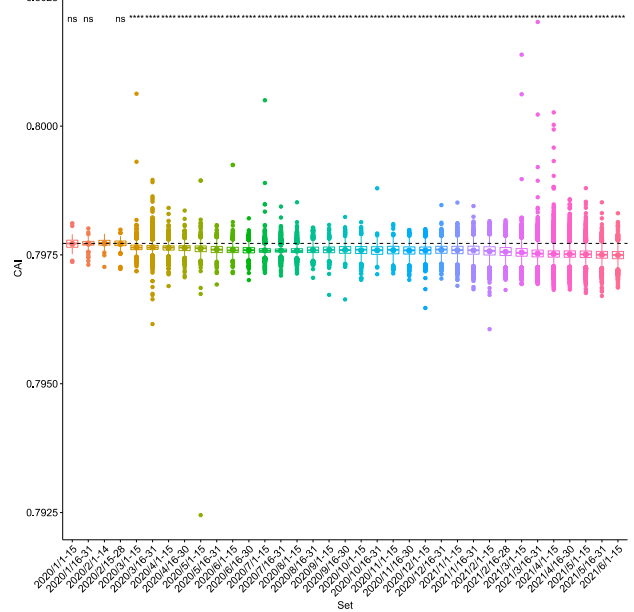

**Figure S12. Evolution of CAI values calculated for concatenated SARS-CoV-2 genes over time.**

**A.**  $W$  calculated as the average of  $w_i$  for every highly expressed gene in a specific human tissue ( $W_{avg}$ ).

**B.**  $W$  calculated for concatenated highly expressed genes in a specific human tissue ( $W_{concat}$ ).

**Dendritic Cells**

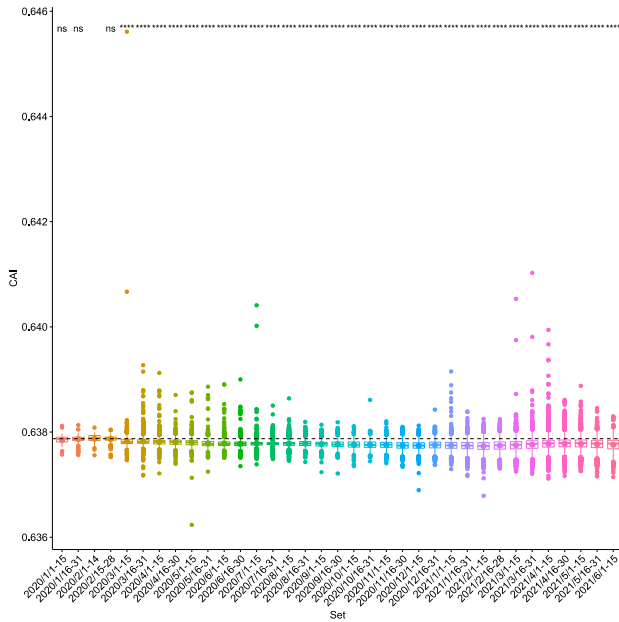

**Dendritic Cells**

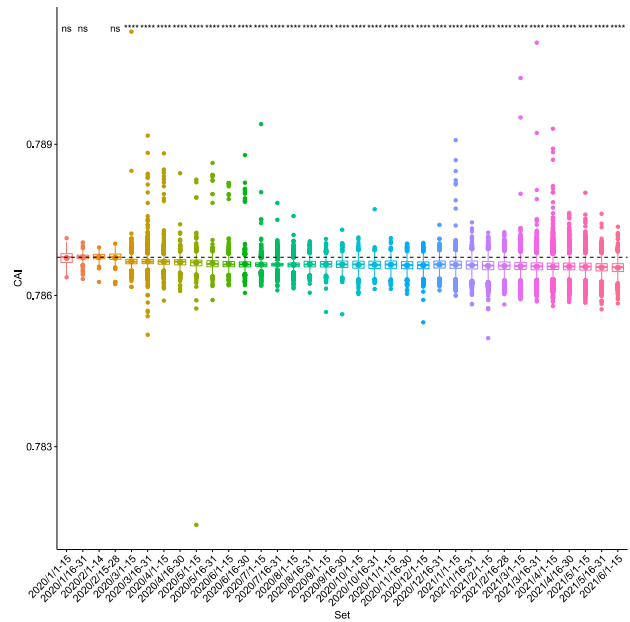

**Lei et al.**

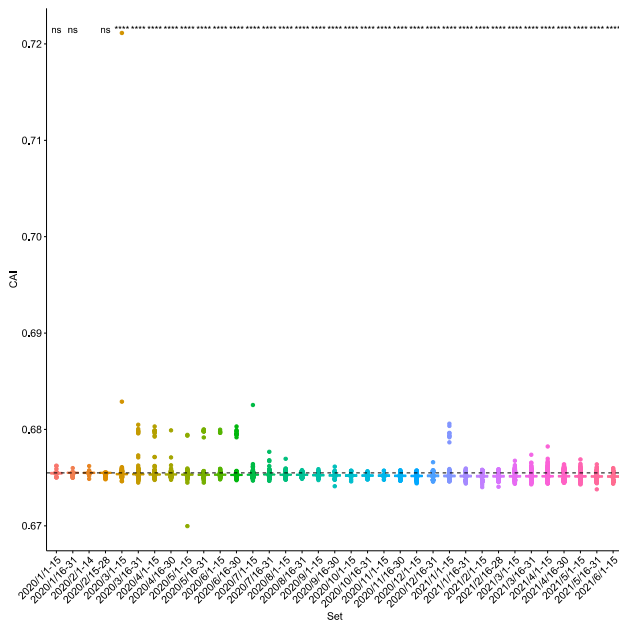

Supplement: mmc5.pdf [file mmc5.pdf]
