# Supplementary material
Source: PubMed Central journal article supplement (PMC8808327)

**Figure S16.** Evolution of CAI for SARSCoV2 ORFs over time for the California dataset.

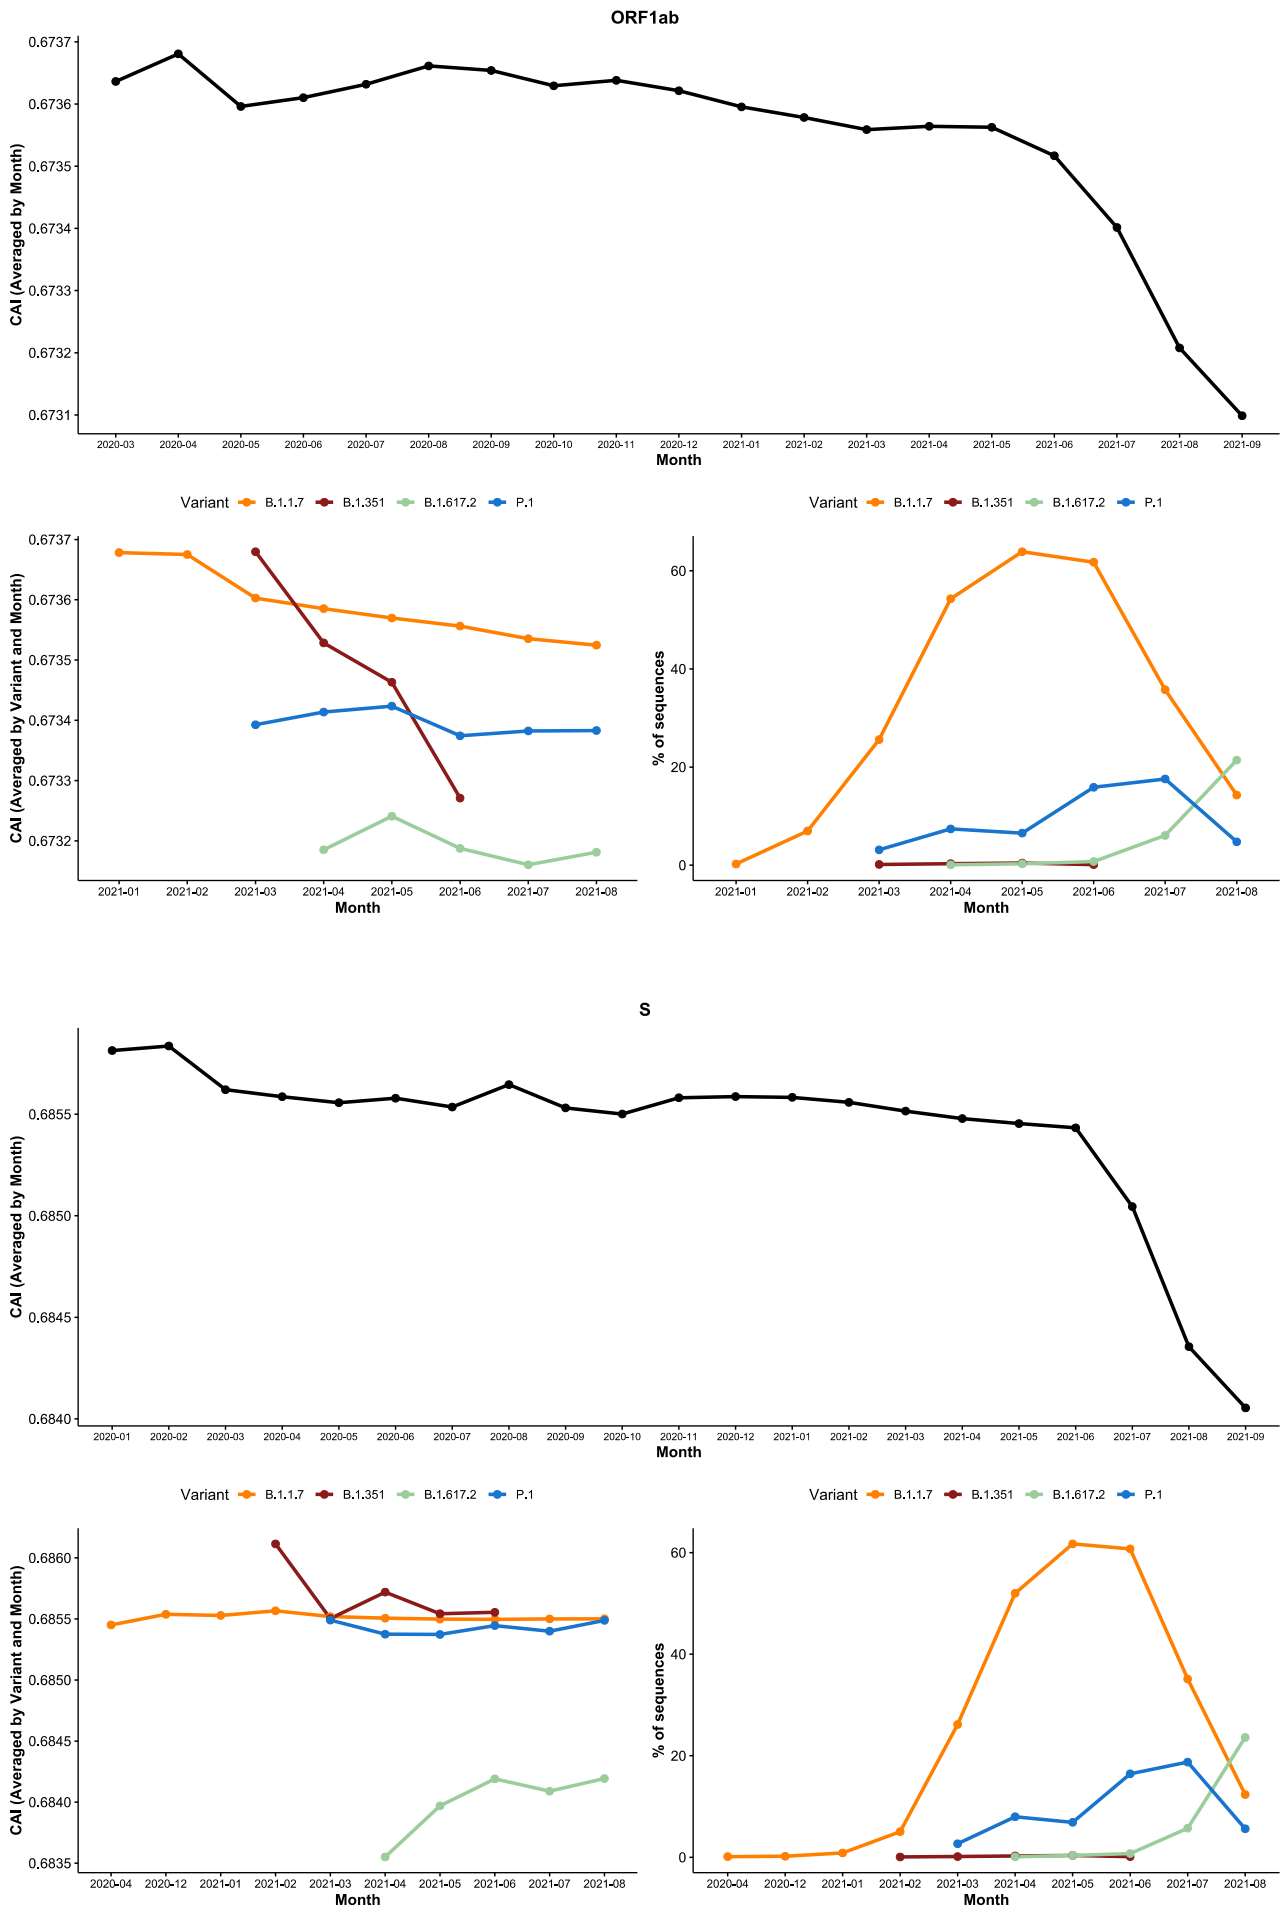

**Figure S16.** Evolution of CAI for SARSCoV2 ORFs over time for the California dataset.

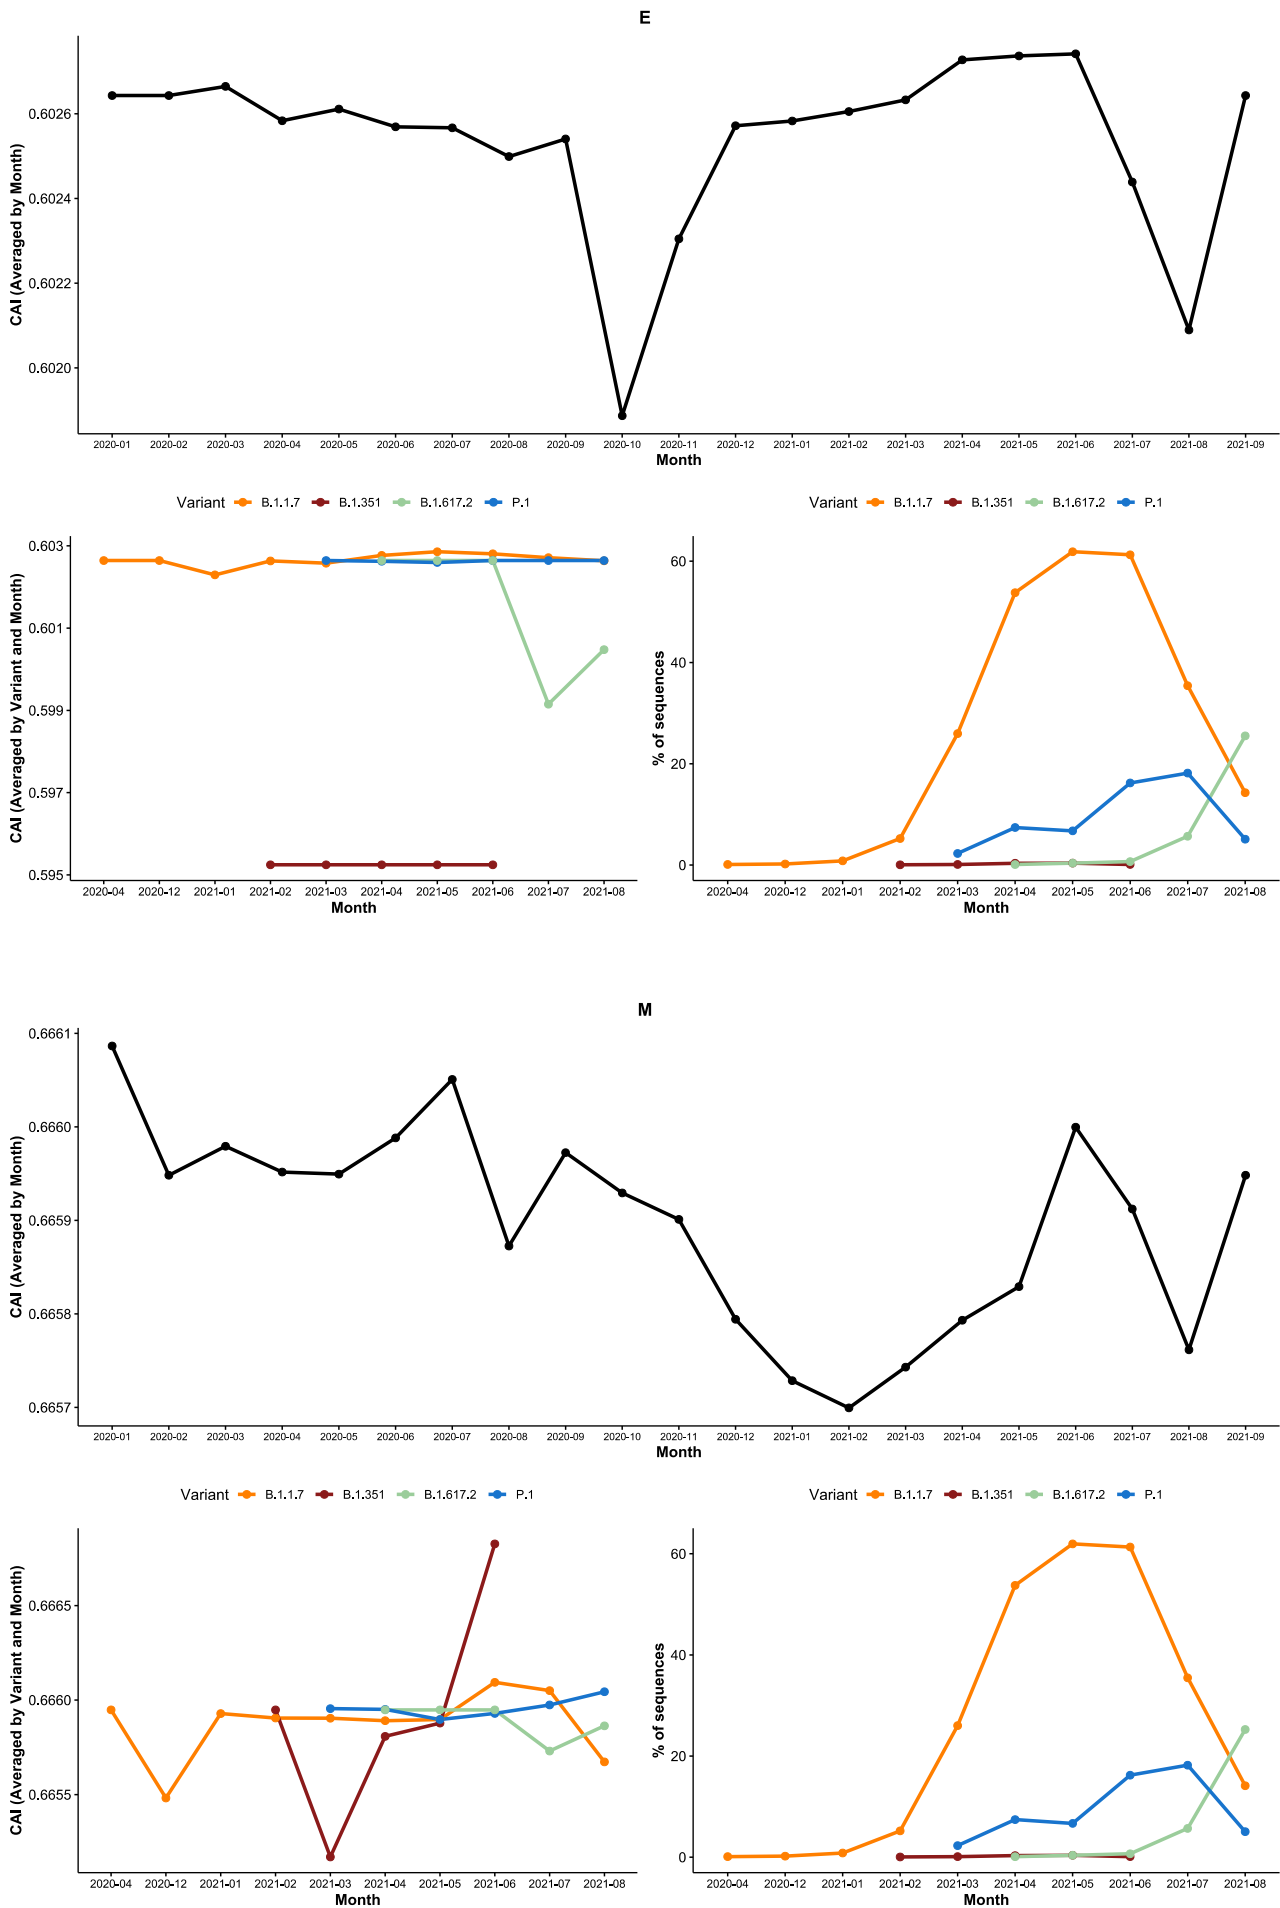

**Figure S16.** Evolution of CAI for SARSCoV2 ORFs over time for the California dataset.

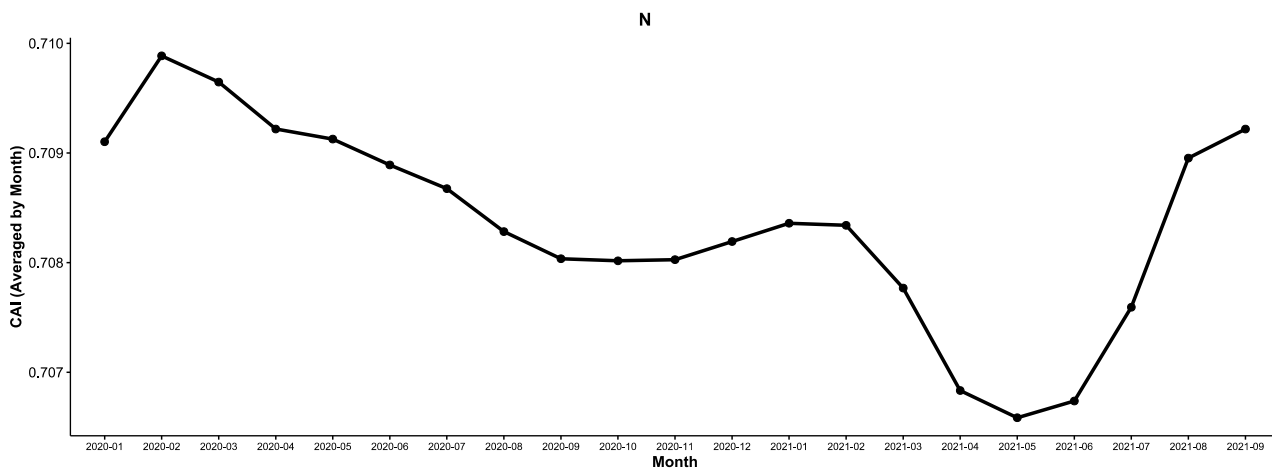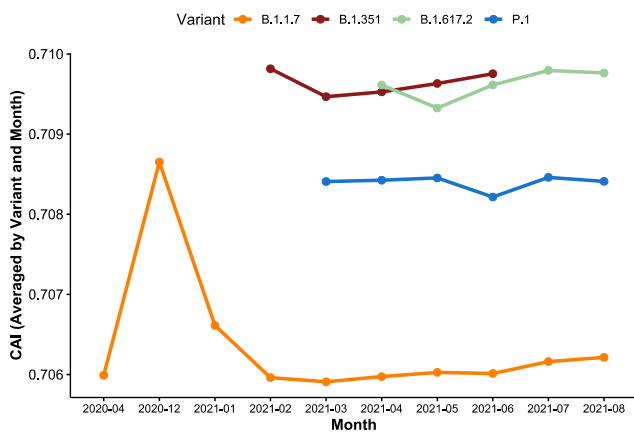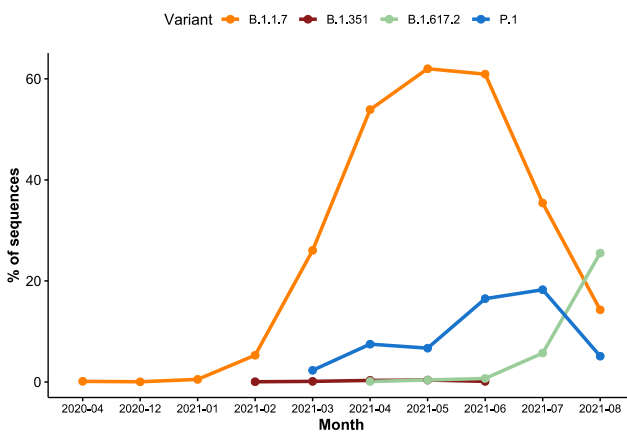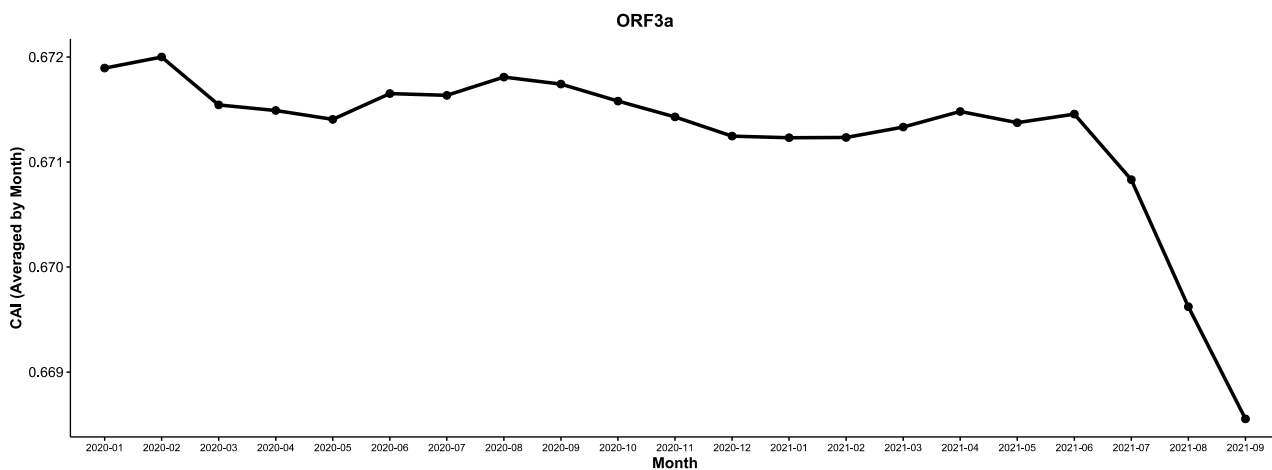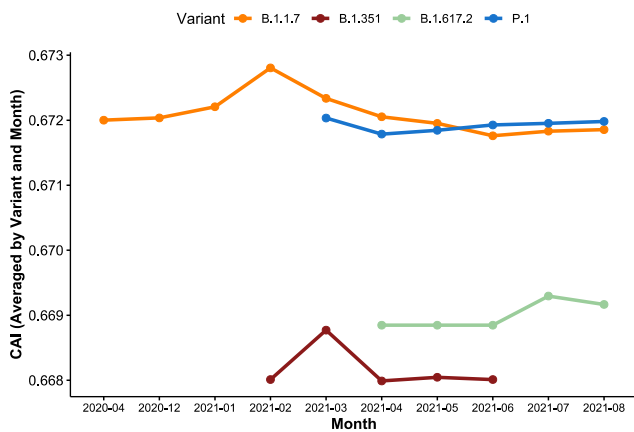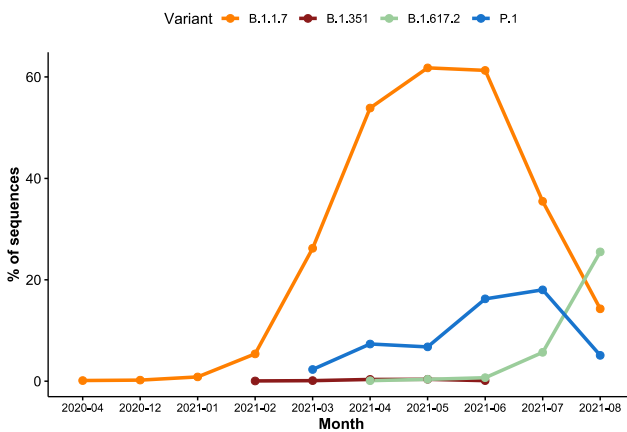

**Figure S16.** Evolution of CAI for SARSCoV2 ORFs over time for the California dataset.

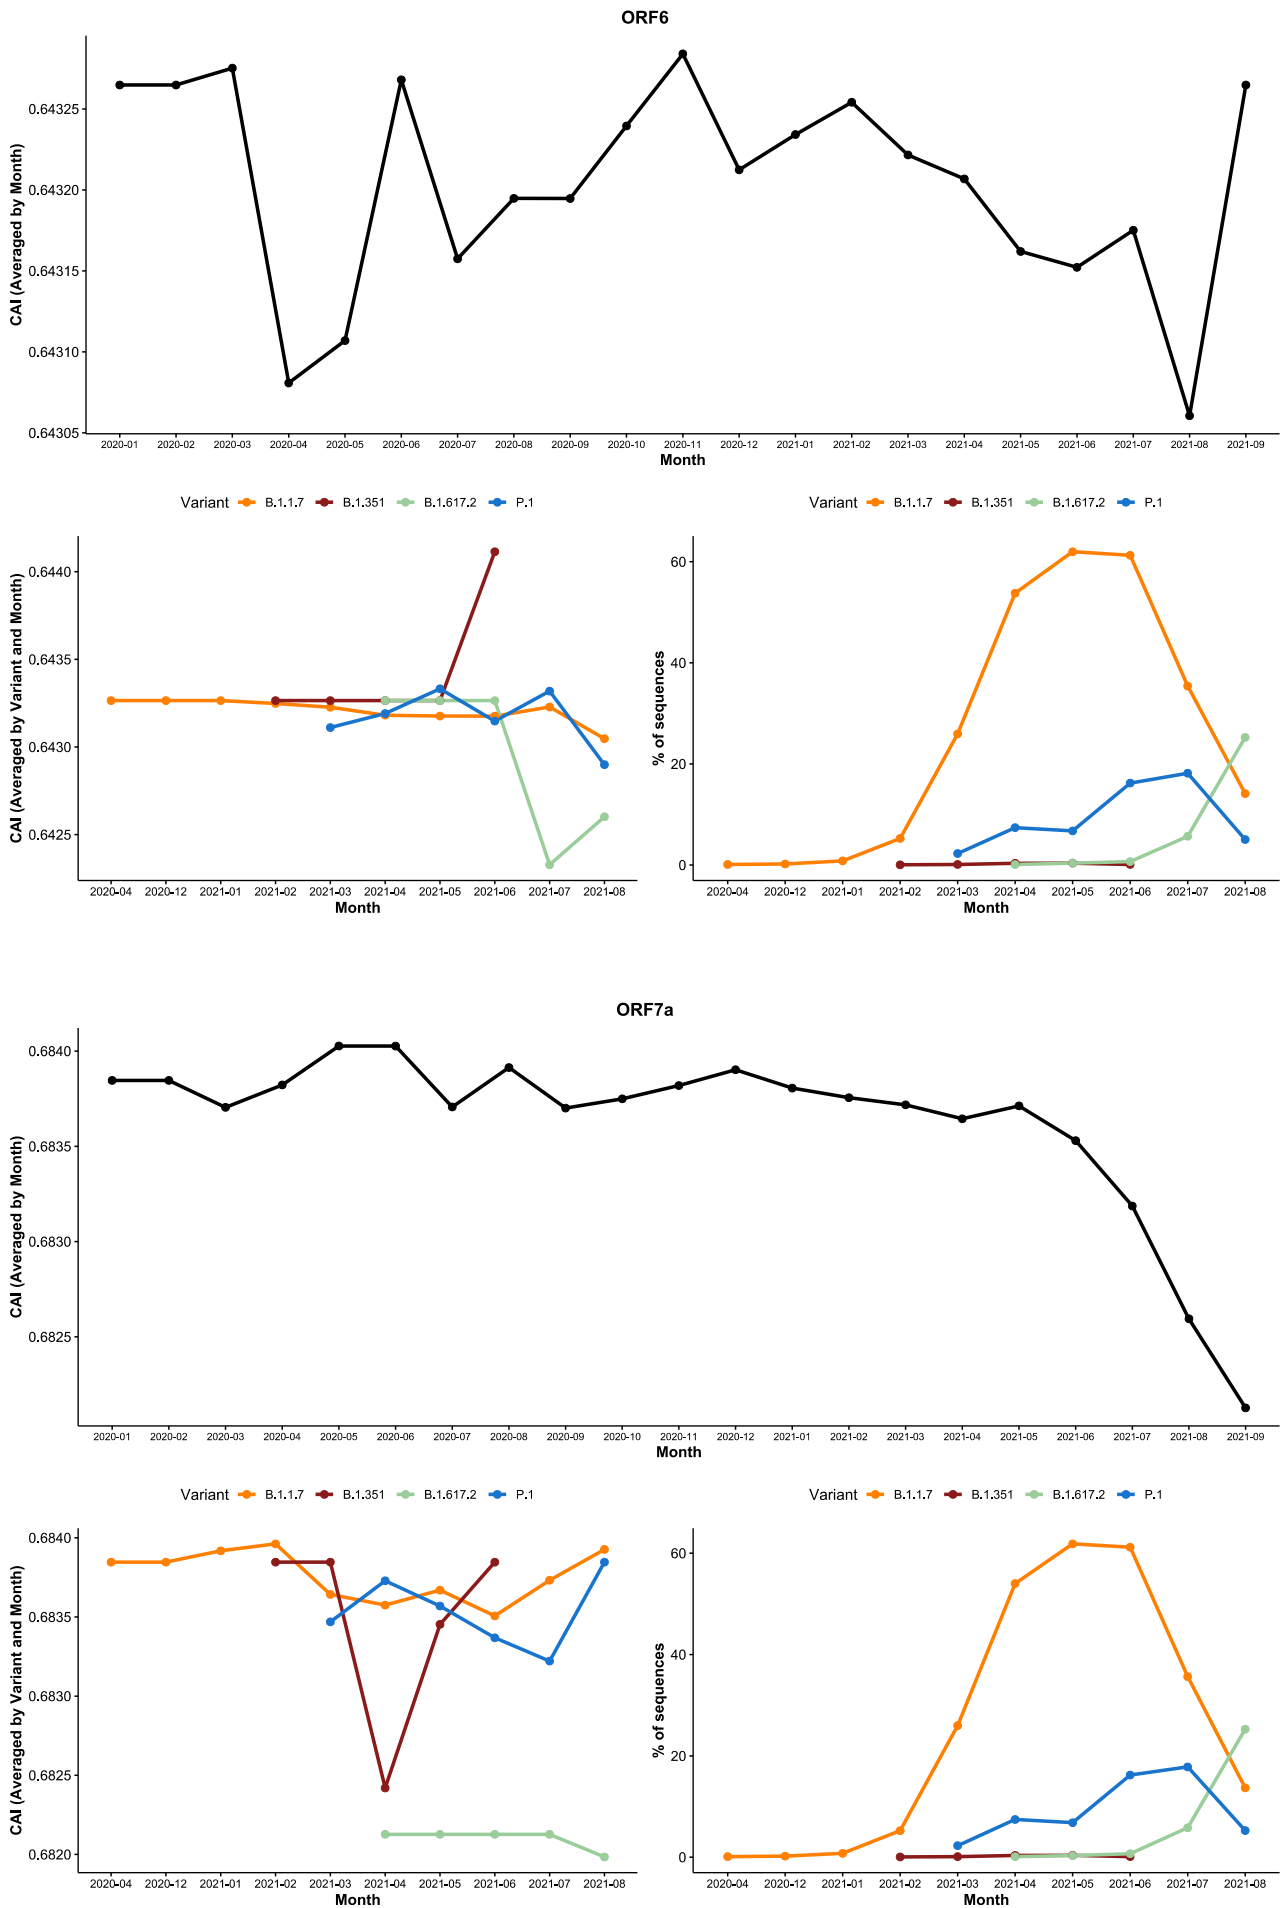

**Figure S16.** Evolution of CAI for SARSCoV2 ORFs over time for the California dataset.

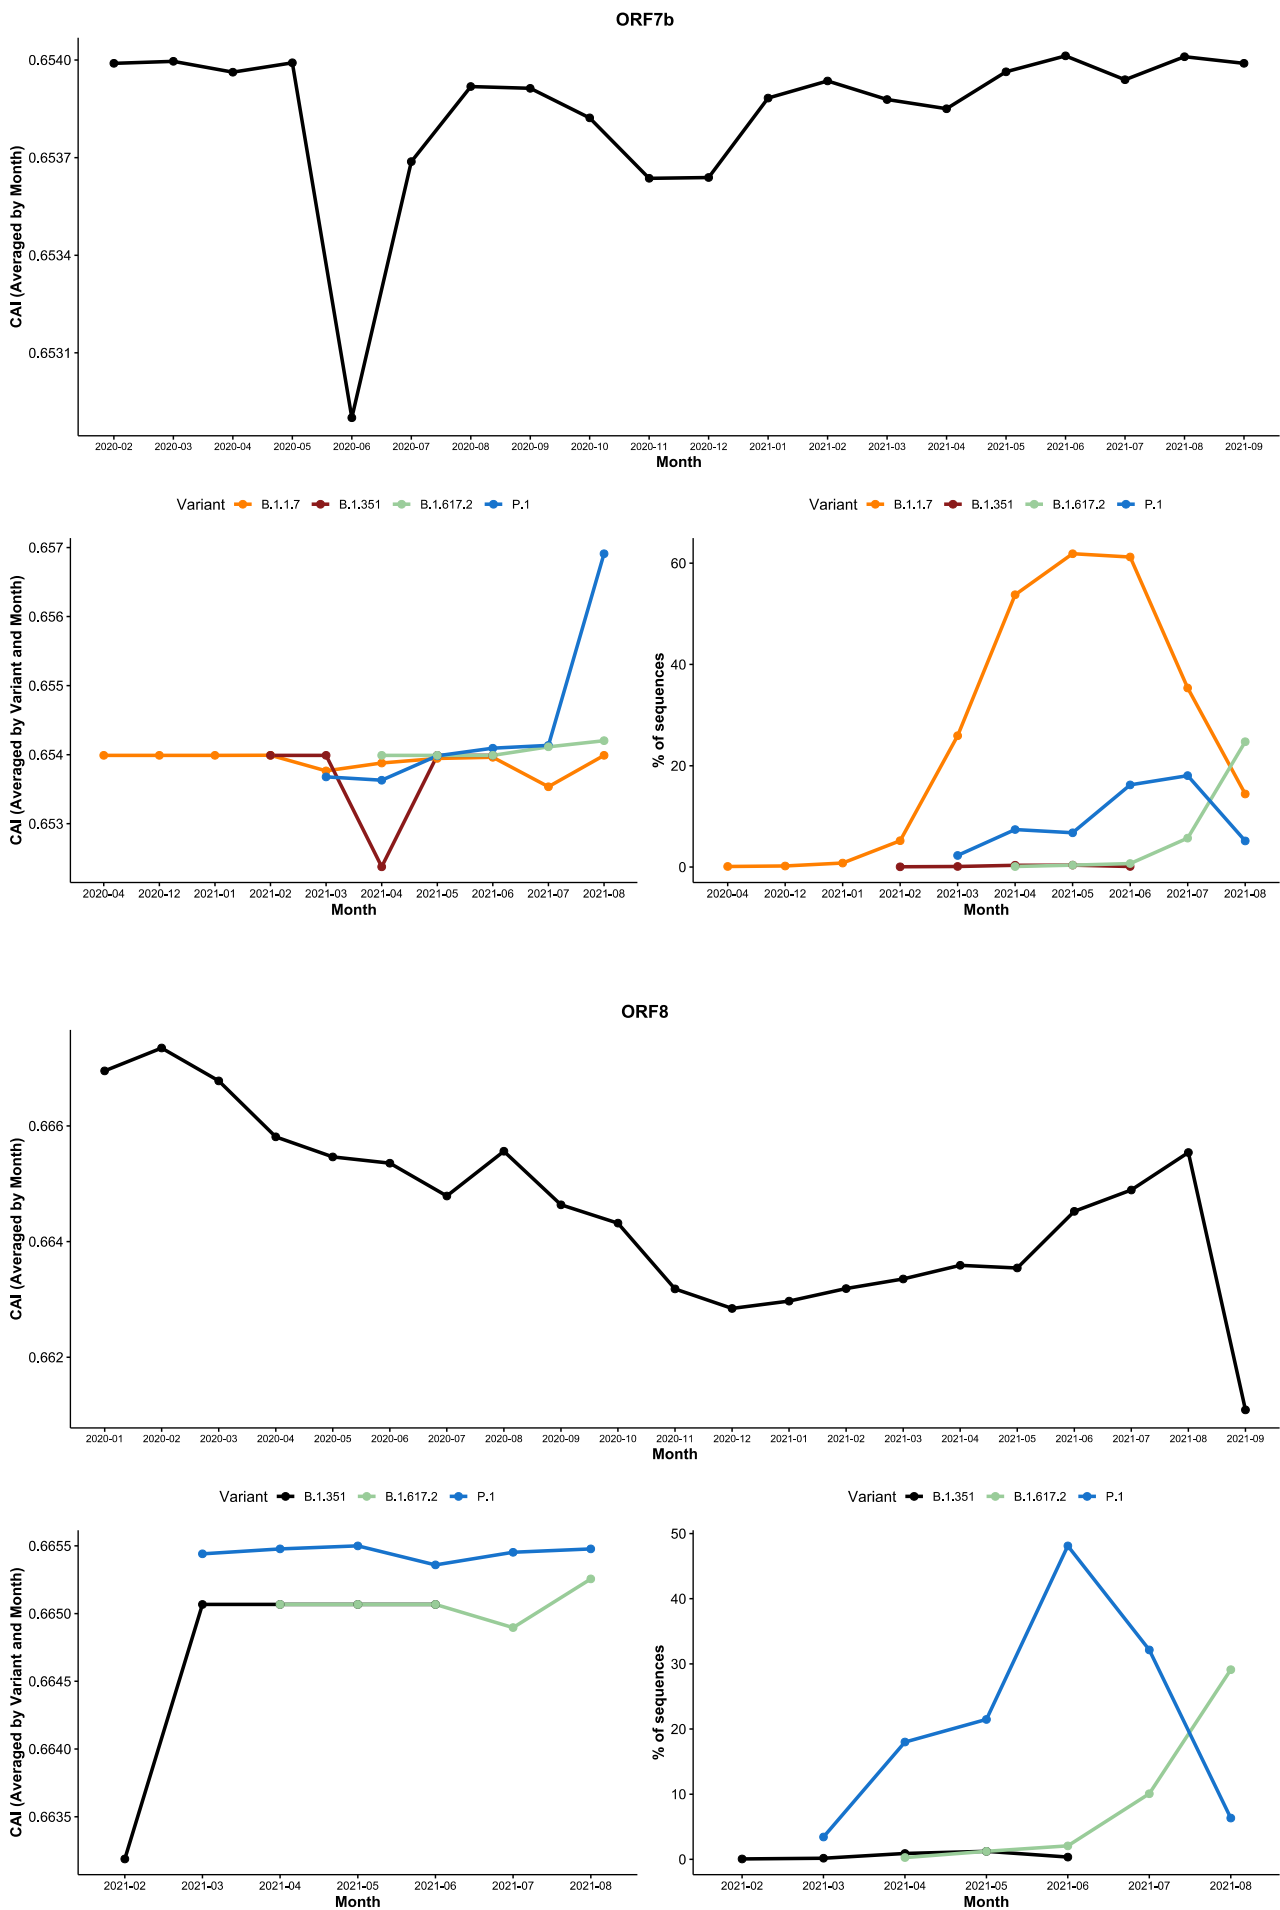

**Figure S16.** Evolution of CAI for SARSCoV2 ORFs over time for the California dataset.

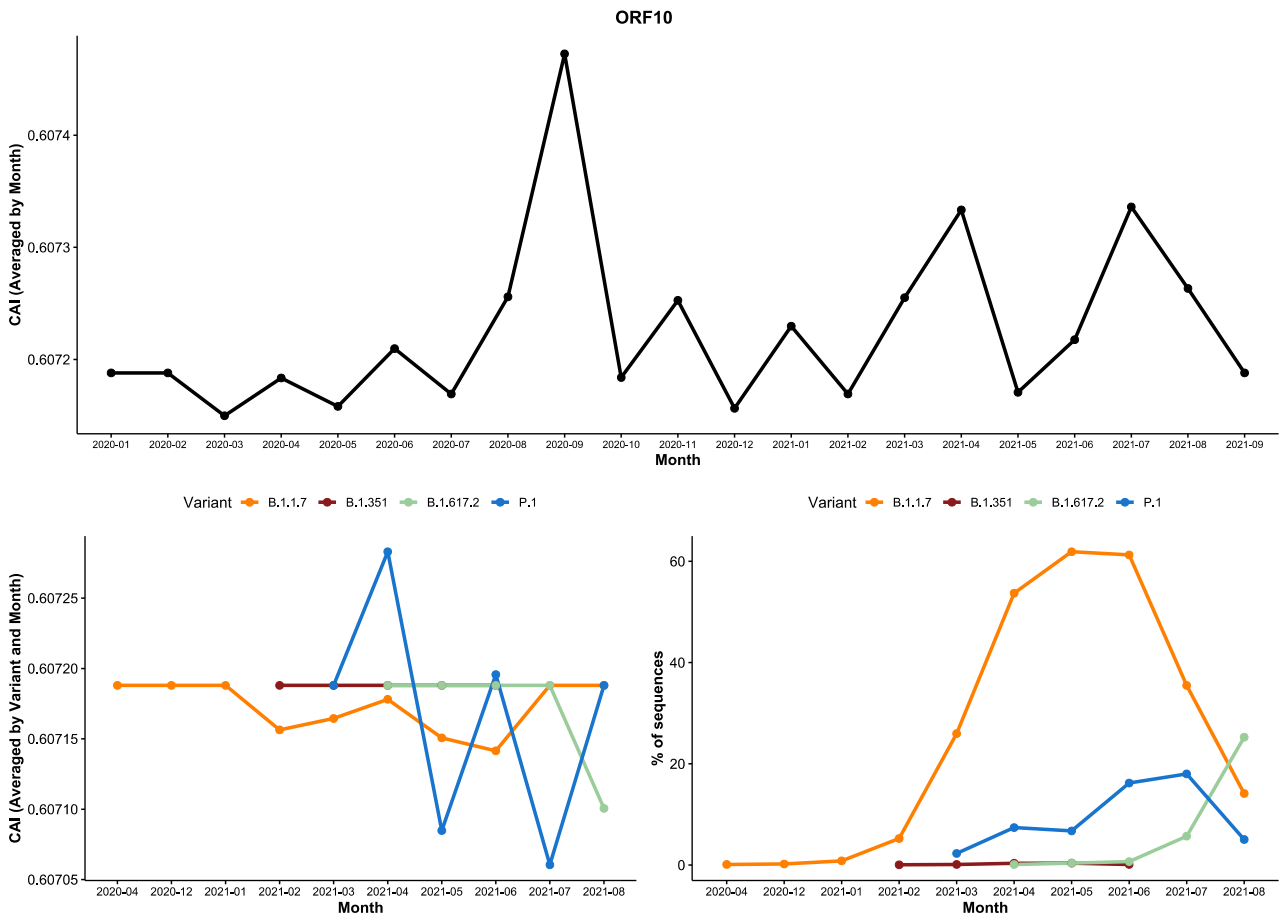

Supplement: mmc4.pdf [file mmc4.pdf]
